# Supplementary material for: Generation, control, and application of stable bubbles in a hypersonic acoustic system
Source: Royal Society of Chemistry journal article supplement (doi:10.1039/d4lc00591k), 2024-01-01
Supplement: d4lc00591k1.pdf [file d4lc00591k1.pdf]

1 **Supporting Information for**  
2 **Generation, Control, and Application of Stable Bubble in Hypersonic Acoustic**  
3 **System**

4 **Xiaotian Shen<sup>a</sup>, Xianwu Ke<sup>a</sup>, Tiechuan Li<sup>a</sup>, Chongling Sun<sup>a</sup>, and Xuexin Duan<sup>a,\*</sup>**

5 <sup>a</sup> *State Key Laboratory of Precision Measuring Technology and Instruments, School of Precision*  
6 *Instrument and Opto-electronics Engineering, Tianjin University, Tianjin 300072, China.*

7 \* Corresponding author. E-mail: [xduan@tju.edu.cn](mailto:xduan@tju.edu.cn)

8 **1 Structure of bulk acoustic device and system setup**

9 The schematic of structure of bulk acoustic wave device was shown in Figure S1. The system  
10 setup was shown in Figure S2.

11

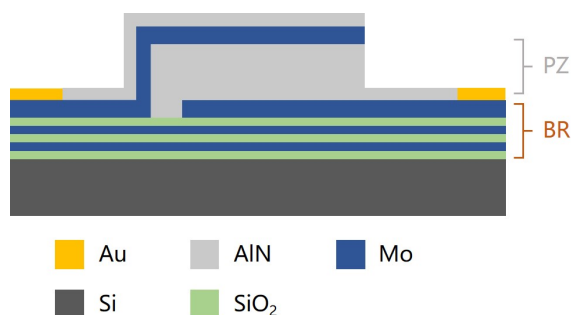

12

13 Figure S1. The schematic of the BAW device structure. BR represents the Bragg reflector structure. PZ represents  
14 the piezoelectric structure.

15

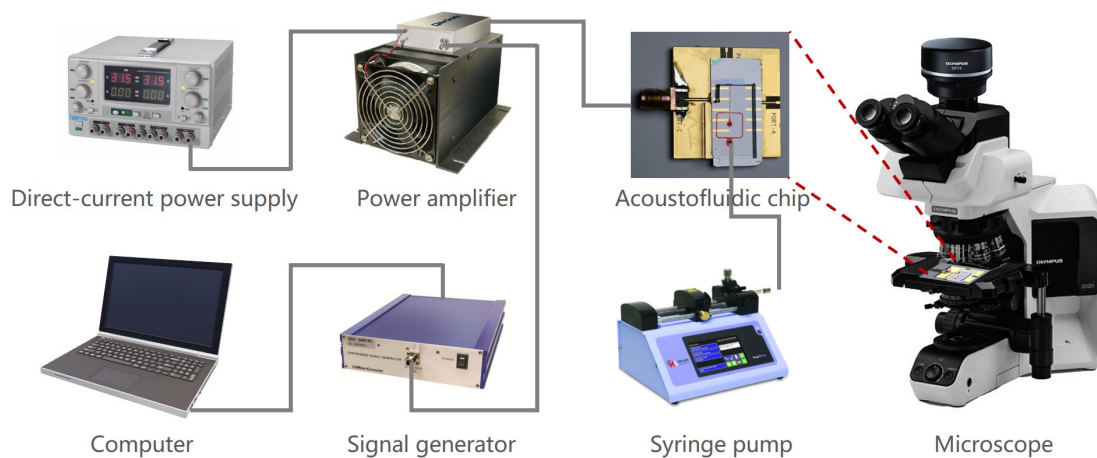

16

17

18

Figure S2. Setup of the hypersonic acoustic system.

## 19 2 Roughening treatment of the surface of BAW device

20 The device was protected by depositing a thin film of aluminum nitride (AlN) as passivation (PS)  
21 layer with the thickness of 200 nm. The PS layer was etched by positive photoresist for 10, 20, 30 and  
22 120 s respectively. The roughness of the device surface was measured by AFM. The RMS roughness  
23 increased with the increase of etching time. When the etching time was greater than 30 s, the RMS  
24 roughness tended to level off (Figure S3). However, the peak-to-valley roughness  $R_t$  was about 320  
25 nm at the etching time of 30 s, which was larger than the thickness of PS layer. That meant there was  
26 a great risk that the top electrode would be exposed to air, resulting in the oxidation and invalidation.  
27 Thus, 20 seconds was a proper etching time to treat the device and maintain the effectiveness of device.  
28  
29

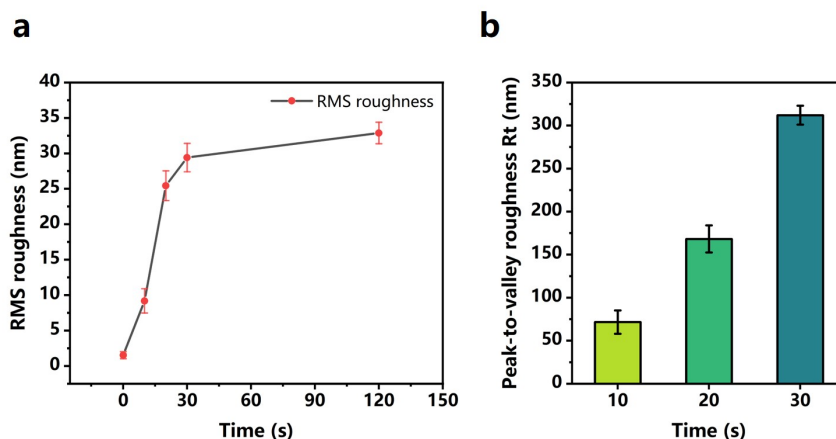

30  
31 Figure S3 Roughness characterization of the device surface with AFM. (a) The RMS roughness versus different  
32 etching times. (b) The peak-to-valley roughness versus different etching times.

33

## 34 3 Acoustothermal effect of hypersonic acoustic system

35 The acoustothermal effect of gigahertz bulk acoustic waves (GHz BAWs) in the oil phase is non-  
36 negligible, especially when high power is applied. To characterize the temperature distribution of GHz  
37 BAWs in oil, pyrromethene 597 was employed as a temperature-sensitive indicator. The pyrromethene  
38 597 was dissolved in the mineral oil with 1.5 wt. % Span 80 at the concentration of 0.129 mg mL<sup>-1</sup>.  
39 The device covered with the microfluidic chip was placed on a hot plate. The device temperature was

40 measured by the thermocouple. The mineral oil seeded with temperature-sensitive fluorescence dye  
41 was pumped into the microchannel. The fluorescence intensity of oil phase at different temperatures  
42 was recorded by the microscopy (Figure S4a). The inner circular region of the pentagon device was  
43 chosen as region of interest (ROI) to extract the fluorescence intensity. The calculation curve of  
44 intensity versus temperature was obtained in Figure S4b, which could be used to characterize the  
45 acoustothermal effect of GHz BAWs in oil.

46

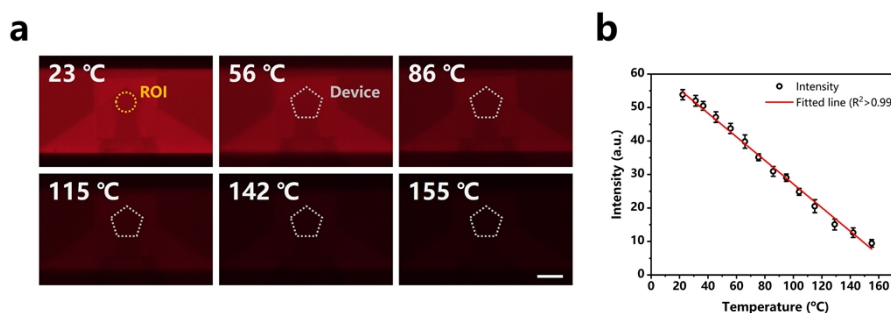

47

48 Figure S4 Characterization of the relation between the fluorescence intensity and temperature. (a) The fluorescent  
49 images at different temperatures. (b) The calibration curve between the temperature and intensity. The scale bar is 50  
50  $\mu\text{m}$ .

51

52 The dynamic changes and temperature distribution in the oil phase were tested experimentally at  
53 different applied powers and flow rates to further examine the acoustothermal effect induced by GHz  
54 BAWs. The real-time changes in oil temperature were determined by analysis of the fluorescence  
55 intensity with reference to the calibration curve. First, the impact of the flow rate of the oil phase on  
56 the temperature distribution was investigated. The temperature distribution at an applied power of 2000  
57 mW at the flow rates of 0.1, 1, and 5  $\mu\text{L min}^{-1}$ , respectively, in the microchannel were measured. As  
58 the flow rate increased, the temperature distribution shifted downstream and expanded (Figure S5a).  
59 A fast-flowing oil phase enhanced heat diffusion in the microchannel. Next, the areas of different  
60 isotherms were calculated to determine the expansion of the temperature distribution at high flow rates  
61 (Figure S6). The areas of the isotherms at 100 °C, 120 °C, and 140 °C at a flow rate of 5  $\mu\text{L min}^{-1}$  were  
62 larger than those of the isotherms at lower flow rates. In addition, the area of the isotherm at 160 °C at  
63 a flow rate of 5  $\mu\text{L min}^{-1}$  was the smallest, due to heat diffusion (Figure S5b). Furthermore, the impact  
64 of input power on thermal effect was considered. The pentagonal effective-piezoelectrical area of the

65 device was chosen as the region of interest (Figure S5c). As the input power increased, the average  
 66 temperature of this area first increased and then stabilized. This stable average temperature was 150–  
 67 170 °C. The maximum temperature at 2000 mW in this area was 166 °C, i.e., less than 218 °C, the  
 68 boiling point of mineral oil (Figure S5d). The higher the power applied, the stronger the inverse  
 69 piezoelectric effect induced, such that the heat generated from viscous attenuation of GHz BAWs and  
 70 electromechanical losses of the device increased. This diffusion and expansion of heat affected the  
 71 coalescence and growth of the bubble.  
 72

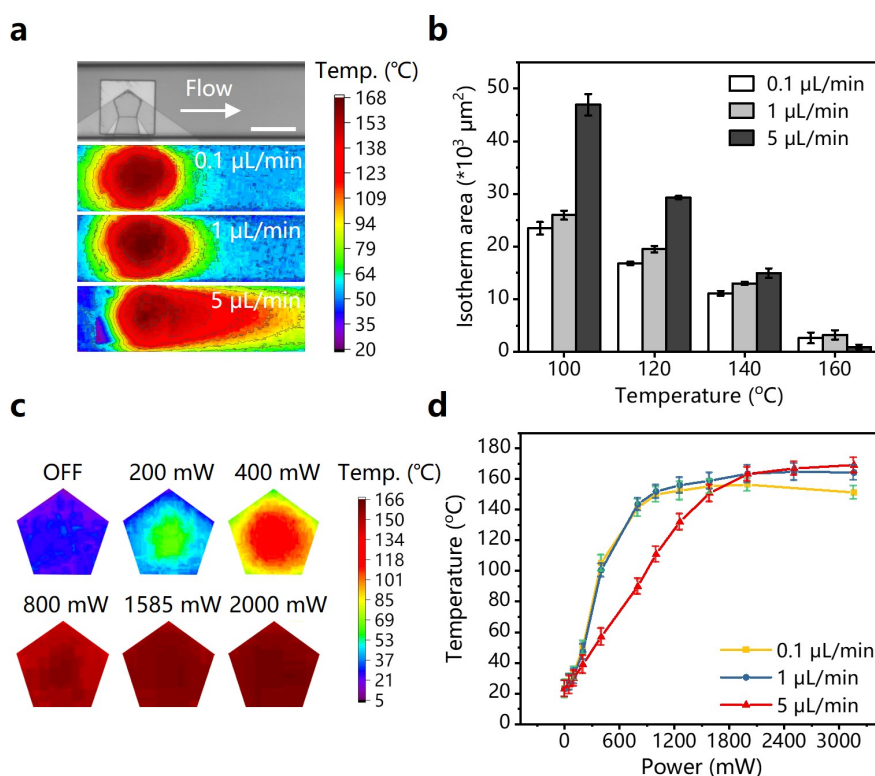

73  
 74 Figure S5 Acoustothermal effect of GHz BAWs in oil. (a) Distribution of oil temperature in the microchannel at an  
 75 applied power of 2000 mW and flow rates of 0.1, 1 and 5  $\mu\text{L}/\text{min}$ , respectively. The scale bar is 100  $\mu\text{m}$ . (b) Areas  
 76 of different isotherms at a power of 2000 mW and flow rates of 0.1, 1 and 5  $\mu\text{L}/\text{min}$ , respectively. (c) Distribution  
 77 of oil temperatures at different applied powers above the pentagonal BAW device. The scale bar is 50  $\mu\text{m}$ . (d)  
 78 Average oil temperature at different applied powers and flow rates above the pentagonal BAW device.  
 79

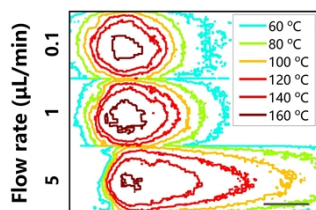

Figure S6 Isotherms at different temperatures and flow rates. The scale bar is 100  $\mu\text{m}$ .

#### 83 **4 Performance of device driven by direct current**

84 To delineate the role of acoustothermal effect during the phase of bubble nucleation, we  
 85 effectively decoupled the thermal field from acoustic field. A direct current (DC) was applied across  
 86 the two ends of the bottom electrode (BE), whereas the top electrode remained unloaded, devoid of  
 87 any electrical signal imposition (Figure S7b). Under these conditions, the heat generation was solely  
 88 attributable to the Joule heating effect of BE, precluding the possibility of acoustic waves generation  
 89 via the inverse piezoelectric effect. This experimental setup facilitated the decoupling of the thermal  
 90 field from the acoustic field, while maintaining consistency in other experimental parameters. The  
 91 temperature distribution was measured by the method in section 3 of Supporting Information.

92 When a voltage of 5 volts was applied to the device, the temperature reached within the  
 93 pentagonal region through Joule heating was roughly equivalent to that achieved by the acoustothermal  
 94 effect under a 2000 mW power input, as discussed in Section 3 in Supporting Information (Figure  
 95 S7a). Scrutinizing the results revealed that, in this case, actuating the device for a duration of 15 s,  
 96 exclusively under the influence of thermal effect, failed to induce bubble formation within the  
 97 designated area (Figure S7c-f). In marked contrast, as illustrated in Section 3.2 in main text, bubble  
 98 was formed within just 1 ms under the simultaneous presence of acoustic and thermal effects. Thus,  
 99 these experimental findings substantiated that during the bubble nucleation stage, the dominant  
 100 impetus was the acoustic wave, rather than the thermal effect. These results substantiated that bubble  
 101 formation was a consequence of the effect induced by acoustic waves, rather than a result of heating  
 102 or outgassing of the oil.

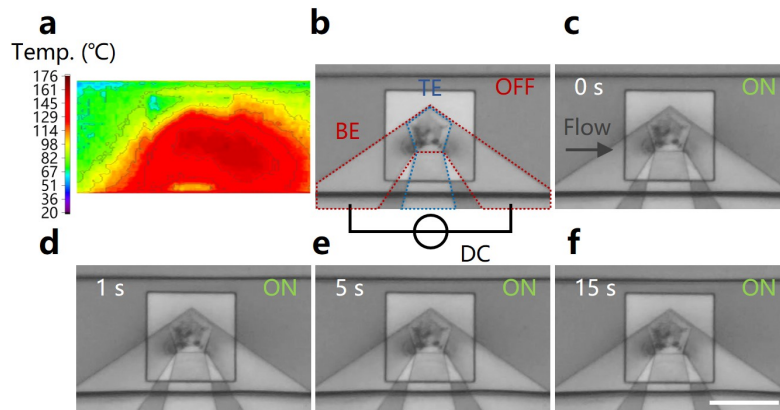

103  
 104 Figure S7. Performance of device driven by direct current in the oil. (a) The temperature distribution in the  
 105 microchannel induced by Joule heat. (b) The direct current (DC) was applied to both ends of the bottom electrode  
 106 (BE). While the top electrode (TE) did not work in this case. (c)-(f) The performance of device at 0, 1, 5, and 10 ms  
 107 when the power of DC was turned on. The scale bar is 100  $\mu\text{m}$ .

108  
 109 **5 Performance of device without nanostructural enhancement**

110 To compare the extent to which a roughened surface facilitates onset, we conducted a control  
 111 experiment. Using a device without nanostructural enhancement, we applied 2500 mW of power and  
 112 monitored for bubble formation. As depicted in Figure S8, no bubble generation was observed within  
 113 30 s. Conversely, for nanostructurally enhanced device, bubbles were produced within 1 ms under the  
 114 power of 1585 mW. This finding underscores the pivotal role of a roughened interface in promoting  
 115 bubble generation under gigahertz acoustic waves.

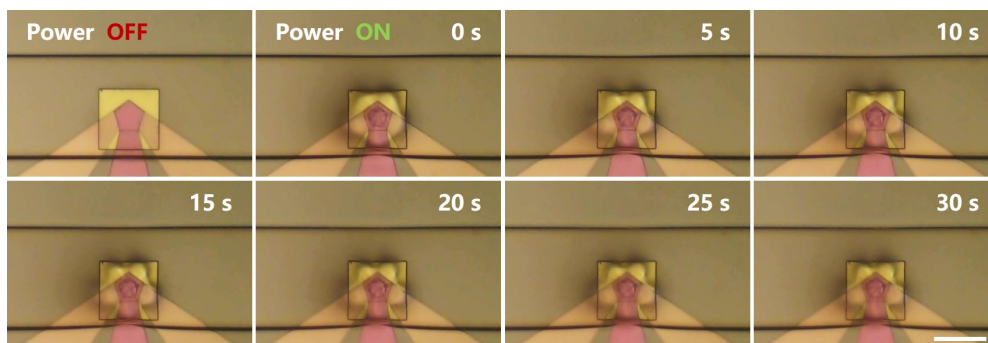

117  
 118 Figure S8. Performance of non-enhanced device. The scale bar is 100  $\mu\text{m}$ .

119  
 120 **6 Critical size of steady bubble**

121 When the micro gas nuclei coalesced with each other to form a steady bubble, the single bubble  
 122 grew continuously supported by the acoustothermal effect. For the minimum surface free energy, the  
 123 steady bubble tended to be spherical by the interfacial tension. When the bubble touched the top of  
 124 microchannel, it would be confined by the ceiling, resulting in the decreased of growth rate. To  
 125 facilitate the calculation, the model of critical bubble was simplified. The size of critical steady bubble  
 126 depended on the size of device and the height of microchannel:

127 
$$R = (r^2 + h^2) / 2h$$

128 where  $R$ ,  $r$  and  $h$  are the radius of steady bubble, the radius of incircle of pentagonal device, and the  
 129 height of microchannel respectively. In this hypersound acoustic system, the theoretical diameter of  
 130 critical steady bubble is  $64 \mu\text{m}$ , which is constant with the experimental results.

131

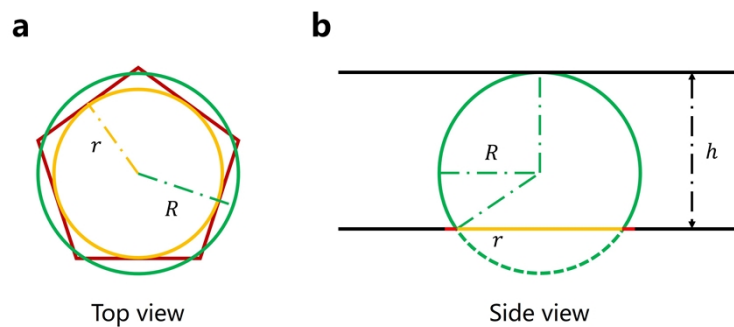

132  
 133 Figure S9. The schematic diagram of the critical steady bubble. (a) The top view above the device and bubble. The  
 134 red pentagon represents the profile of acoustic device. The yellow circle is the incircle of pentagonal device. The  
 135 green circle represents the profile of steady bubble.  $r$  is the radius of incircle of pentagonal device.  $R$  is the radius of  
 136 steady bubble. (b) The side view of the device and bubble. The black lines represent the bottom and top of the  
 137 microchannel.  $h$  is the height of the microchannel.

138

### 139 7 Evolution of the bubble

140

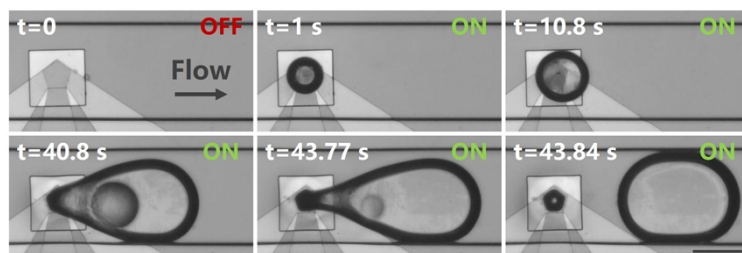

141  
142  
143

Figure S10. Evolution of the bubble when the device is continuously turned on. The scale bar is 100  $\mu\text{m}$ .

## 144 8 Influence of flow rate on the bubble size

145

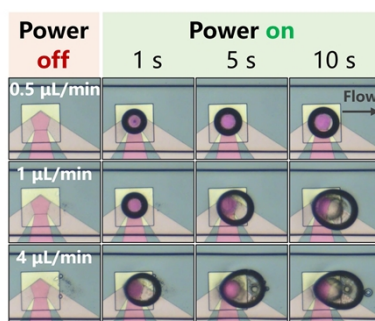

146

147 Figure S11. Steady bubble at different time points when the flow rate of oil was 0.1, 1 and 5  $\mu\text{L min}^{-1}$  respectively.

148 The scale bar is 100  $\mu\text{m}$ .

149

## 150 9 Droplet splitting

151 Oil and water were infused into the microfluidic chip via syringe pumps. At the flow-focusing

152 structure, the oil (continuous phase) separated the water (dispense phase) into discrete microdroplets.

153 These water-in-oil microdroplets progressed downstream into the straight channel. Within the straight

154 channel, stable bubbles were utilized to perform splitting operations on the microdroplets.

155

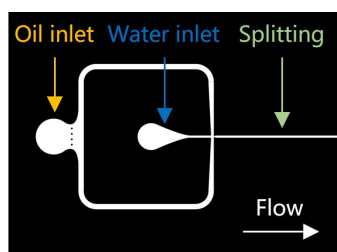

156

157 Figure S12. Structure of the microfluidic chip employed for the generation and splitting manipulation of droplets.

158



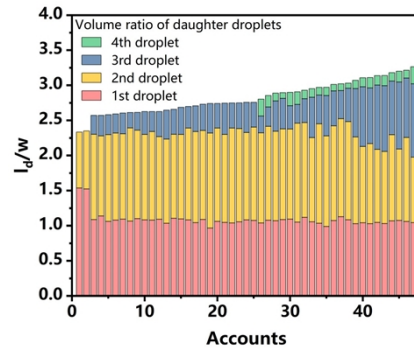

159

160

161

Figure S13. Volume ratio of daughter droplets versus different volume of mother droplets.
